# Supplementary material for: Characterization of Rickets Type II Model Rats to Reveal Functions of Vitamin D and Vitamin D Receptor
Source: MDPI journal article supplement (doi:10.3390/biom13111666), 2023-11-19
Supplement: s1 [file s1]

**(A) *Vdr*-KO 14 wk**

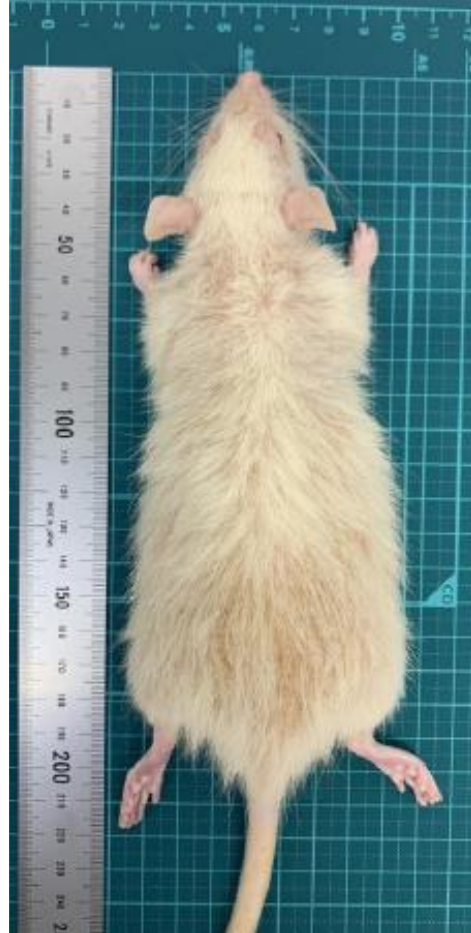

**(B) *Vdr*-KO 30 wk**

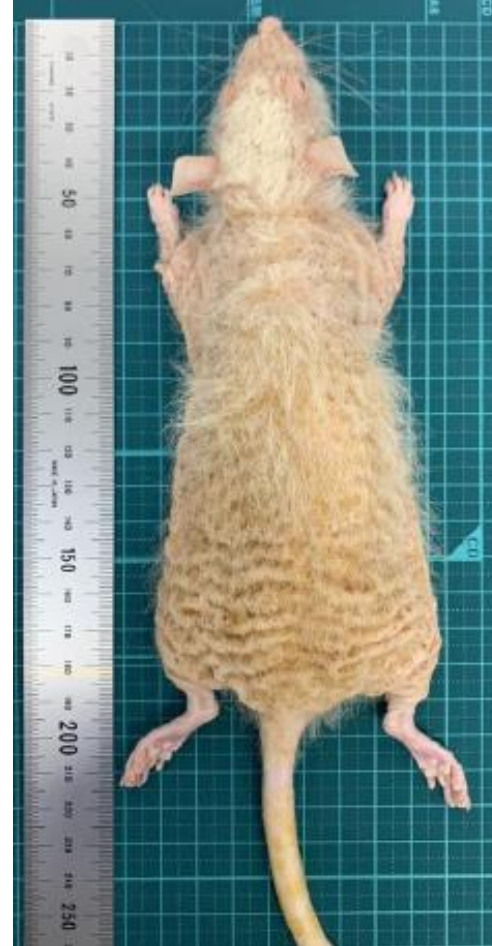

**Suppl. Fig.1** Progress of alopecia and skin aging in *Vdr* KO rats. Comparison between 14 weeks (A) and 30 weeks (B) after birth.

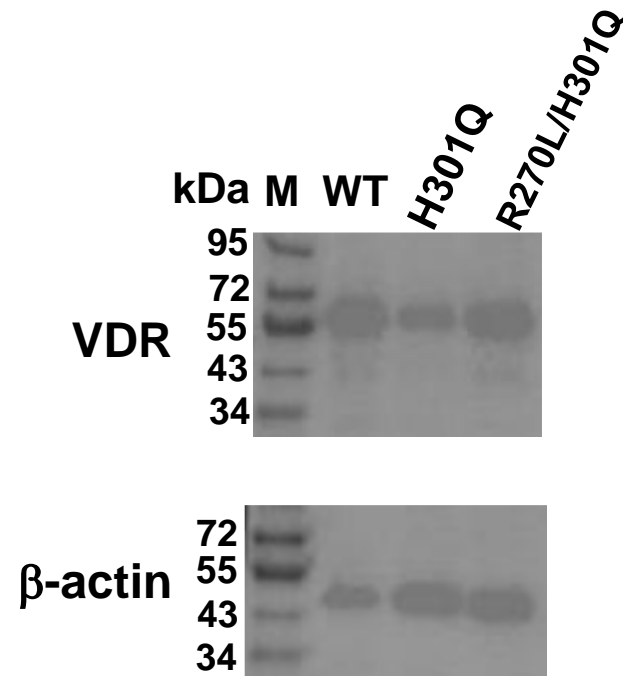

Suppl. Fig. 2

Western blot analysis of VDRs expressed in dorsal skin of WT, Vdr(H301Q), and Vdr(R270L/H301Q) rats.
